# Supplementary material
Source: PubMed Central journal article supplement (PMC7846899)
Supplement: mmc3.pdf [file mmc3.pdf]

```
#####
# Program: needle
# Rundate: Sun 24 May 2020 17:21:07
# Commandline: needle
#   -auto
#   -stdout
#   -asequence emboss_needle-I20200524-172200-0614-74180216-p1m.asequence
#   -bsequence emboss_needle-I20200524-172200-0614-74180216-p1m.bsequence
#   -datafile EBLOSUM62
#   -gapopen 10.0
#   -gapextend 0.5
#   -endopen 10.0
#   -endextend 0.5
#   -aformat3 pair
#   -sprotein1
#   -sprotein2
# Align_format: pair
# Report_file: stdout
#####
```

```
#=====
#
# Aligned_sequences: 2
# 1: M3W594_FELCA
# 2: P09958_FURIN_HUMAN
# Matrix: EBLOSUM62
# Gap_penalty: 10.0
# Extend_penalty: 0.5
#
# Length: 794
# Identity:      766/794 (96.5%)
# Similarity:   772/794 (97.2%)
# Gaps:         1/794 ( 0.1%)
# Score: 4083.0
#
#=====
```

|               |     |                                                    |     |
|---------------|-----|----------------------------------------------------|-----|
| M3W594_FELCA  | 1   | MELRPWLLWVVAAGALVLLAADACGQKVYTNWAVHIPGGPAVADSLAR   | 50  |
|               |     | . . . . . . . . . . . . . . . . . . . . . . .      |     |
| P09958_FURIN_ | 1   | MELRPWLLWVVAATGTLVLLAADAQGQKVFTNTWAVRIPGGPAVANSVAR | 50  |
| M3W594_FELCA  | 51  | KHGFLNLGQIFGDYYHFWHRAVTKRSLSPHRPRHSRLQREPQVQWLEQQV | 100 |
|               |     | . . . . . . . . . . . . . . . . . . . . . . .      |     |
| P09958_FURIN_ | 51  | KHGFLNLGQIFGDYYHFWHRGVTKRSLSPHRPRHSRLQREPQVQWLEQQV | 100 |
| M3W594_FELCA  | 101 | AKRRTKRDVYQEPTDPKFPQQWYLSGVTQRDLNVKEAWAQGYTGHGIVVS | 150 |
|               |     | . . . . . . . . . . . . . . . . . . . . . . .      |     |
| P09958_FURIN_ | 101 | AKRRTKRDVYQEPTDPKFPQQWYLSGVTQRDLNVKAAWAQGYTGHGIVVS | 150 |

|               |     |                                                              |     |
|---------------|-----|--------------------------------------------------------------|-----|
| M3W594_FELCA  | 151 | ILDDGIEKNHPDLAGNYDPGASFDVNDQDPDPQPRYTQMNDNRHGTRCAG<br>       | 200 |
| P09958_FURIN_ | 151 | ILDDGIEKNHPDLAGNYDPGASFDVNDQDPDPQPRYTQMNDNRHGTRCAG<br>       | 200 |
| M3W594_FELCA  | 201 | EVAAVANNGVCGVGVAYNARIGGVRMLDGEVTDAVEARSLGLNPNIHIY<br>        | 250 |
| P09958_FURIN_ | 201 | EVAAVANNGVCGVGVAYNARIGGVRMLDGEVTDAVEARSLGLNPNIHIY<br>        | 250 |
| M3W594_FELCA  | 251 | SASWGPEDDGKTVDGPARLAEAEAFRQVSVQGRGGLGSIFVWASGNGGREH<br>      | 300 |
| P09958_FURIN_ | 251 | SASWGPEDDGKTVDGPARLAEAEAFRQVSVQGRGGLGSIFVWASGNGGREH<br>      | 300 |
| M3W594_FELCA  | 301 | DSCNCDGYTNSIYTLSSISSATQLGNVPWYSEACSSTLATTYSSGSQNEKQ<br>      | 350 |
| P09958_FURIN_ | 301 | DSCNCDGYTNSIYTLSSISSATQFGNVPWYSEACSSTLATTYSSGNQNEKQ<br>      | 350 |
| M3W594_FELCA  | 351 | IVTTDLRQKCTESHTGTSASAPLAAGIALTLEANKNLTWRDMQHLVVQT<br>        | 400 |
| P09958_FURIN_ | 351 | IVTTDLRQKCTESHTGTSASAPLAAGIALTLEANKNLTWRDMQHLVVQT<br>        | 400 |
| M3W594_FELCA  | 401 | SKPAHLNANDWATNGVGRKVSYSYGYGLLDAGAMVTLAQNWTTVAPQRKC<br>       | 450 |
| P09958_FURIN_ | 401 | SKPAHLNANDWATNGVGRKVSYSYGYGLLDAGAMVALAQNWTTVAPQRKC<br>       | 450 |
| M3W594_FELCA  | 451 | IIDILTEPKDIGKRLEVRKMVTAACLGEPHITRLEHAQARLTLSYNRRGD<br>       | 500 |
| P09958_FURIN_ | 451 | IIDILTEPKDIGKRLEVRKVTACLGEPNHITRLEHAQARLTLSYNRRGD<br>        | 500 |
| M3W594_FELCA  | 501 | LAIHLVSPMGTRSTLLAARPHDYSADGFNDWAFMTTHSWDEDPSGEWVLE<br>       | 550 |
| P09958_FURIN_ | 501 | LAIHLVSPMGTRSTLLAARPHDYSADGFNDWAFMTTHSWDEDPSGEWVLE<br>       | 550 |
| M3W594_FELCA  | 551 | IENTSEANNYGTLTKFTLVLYGTAPEGLHAPPESSGCKLTSSQACVVCE<br>        | 600 |
| P09958_FURIN_ | 551 | IENTSEANNYGTLTKFTLVLYGTAPEGLPVPESSGCKLTSSQACVVCE<br>         | 600 |
| M3W594_FELCA  | 601 | EGFSLHQKSCVQHCPPGFTPQVLDTHYSTENDVEIIRASVCAPCHASCAT<br>       | 650 |
| P09958_FURIN_ | 601 | EGFSLHQKSCVQHCPPGFAPQVLDTHYSTENDVETIRASVCAPCHASCAT<br>       | 650 |
| M3W594_FELCA  | 651 | CQGLAPTDCLSCPSHASLDPVEQTCRSQSQSSRES-PEQQPPRPPPEVEA<br>   . . | 699 |
| P09958_FURIN_ | 651 | CQGPALTDCLSCPSHASLDPVEQTCRSQSQSSRESPPQQQPPRLPPEVEA<br>   . . | 700 |
| M3W594_FELCA  | 700 | EPRARAELLPSHLPEVVAGLSCAFIVLVFVTVFLVLQLRSGFSFRGVKVV<br>.. . . | 749 |
| P09958_FURIN_ | 701 | GQRLRAGLLPSHLPEVVAGLSCAFIVLVFVTVFLVLQLRSGFSFRGVKVV<br>.. . . | 750 |

M3W594\_FELCA 750 TMDRGLISYKGLPPEAWQEEG PSDSEED EGRGERTAFIKDQSAL 793  
||||| . |||||  
P09958\_FURIN\_ 751 TMDRGLISYKGLPPEAWQEEC PSDSEED EGRGERTAFIKDQSAL 794

#-----  
#-----

#####

# Program: water  
# Rundate: Fri 22 May 2020 15:19:38  
# Commandline: water  
# -auto  
# -stdout  
# -asequence emboss\_water-I20200522-151937-0280-4325025-p2m.asequence  
# -bsequence emboss\_water-I20200522-151937-0280-4325025-p2m.bsequence  
# -datafile EBLOSUM62  
# -gapopen 10.0  
# -gapextend 0.5  
# -aformat3 pair  
# -sprotein1  
# -sprotein2  
# Align\_format: pair  
# Report\_file: stdout  
#####

#=====

#  
# Aligned\_sequences: 2  
# 1: ACE2\_FELCA  
# 2: ACE2\_HUMAN  
# Matrix: EBLOSUM62  
# Gap\_penalty: 10.0  
# Extend\_penalty: 0.5  
#  
# Length: 805  
# Identity: 686/805 (85.2%)  
# Similarity: 743/805 (92.3%)  
# Gaps: 0/805 ( 0.0%)  
# Score: 3717.0  
#  
#  
#=====

|            |     |                                                     |     |
|------------|-----|-----------------------------------------------------|-----|
| ACE2_FELCA | 1   | MSGSFWLLLSFAALTAQSTTEELAKTFLEKFNHEAEELSYQSSLASWNY   | 50  |
|            |     | . .     .. :     .  .     :     : .                 |     |
| ACE2_HUMAN | 1   | MSSSSWLLLSLVAVTAAQSTIEEQAKTFLDKFNHEAEDLFYQSSLASWNY  | 50  |
| ACE2_FELCA | 51  | NTNITDENVQKMNEAGAKWSAFYEEQSKLAKTYPLAEIHNTTVKRQLQAL  | 100 |
|            |     | :     .  .  .     .:.   .   .   .   .               |     |
| ACE2_HUMAN | 51  | NTNITEENVQNMNAGDKWSAFLKEQSTLAQMYPLQEIQNLTVKQLQAL    | 100 |
| ACE2_FELCA | 101 | QQSGSSVLSADKSQRLNTILNAMSTIYSTGKACNPNNPQECLLLEPGLDD  | 150 |
|            |     | :     .  :     .     ..  :                          |     |
| ACE2_HUMAN | 101 | QQNGSSVLSSEDKSKRLNTILNTMSTIYSTGKVCNPDNPQECLLLEPGLNE | 150 |

|            |     |                                                                                                      |     |
|------------|-----|------------------------------------------------------------------------------------------------------|-----|
| ACE2_FELCA | 151 | IMENSKDYNERLWAWEGWRAEVGKQLRPLYEEYVALKNEMARANNYEDYG<br>  .  .       :       :                         | 200 |
| ACE2_HUMAN | 151 | IMANSLDYNERLWAWESWRSEVGKQLRPLYEEYVVLKNEMARANHYEDYG                                                   | 200 |
| ACE2_FELCA | 201 | DYWRGDYEEEWTDGYNYSRSQLIKDVEHTFTQIKPLYQHLHAYVRAKLMD<br>       . . . .    :    :     . :     :       : | 250 |
| ACE2_HUMAN | 201 | DYWRGDYEVNGVDGYDYSRQLIEDVEHTFEEIKPLYEHLHAYVRAKLMD                                                    | 250 |
| ACE2_FELCA | 251 | TYPSRISPTGCLPAHLLGDMWGRFWTNLYPLTVPFQKPNIDVTDAMVNQ<br>.   .   .       :       :       :               | 300 |
| ACE2_HUMAN | 251 | AYPSYISPIGCLPAHLLGDMWGRFWTNLYSLTVPFQKPNIDVTDAMVDQ                                                    | 300 |
| ACE2_FELCA | 301 | SWDARRIFKEAEKFFVSVGLPNMTQGFWENSMLTEPGDSRKVVCHPTAWD<br>:    :       :       :    : . :                | 350 |
| ACE2_HUMAN | 301 | AWDAQRIFKEAEKFFVSVGLPNMTQGFWENSMLTDPGNVQKAVCHPTAWD                                                   | 350 |
| ACE2_FELCA | 351 | LGKGDFRIMCTKVTMDDFLTAHHEMGGHIQYDMAYAVQPFLLRNGANEGF<br>       .        :       :                      | 400 |
| ACE2_HUMAN | 351 | LGKGDFRILMCTKVTMDDFLTAHHEMGGHIQYDMAYAAQPFLLRNGANEGF                                                  | 400 |
| ACE2_FELCA | 401 | HEAVGEIMSLSAATPNHLKTIGLLSPGFSEDETEINFLKQALTIVGTL<br>       :    :     . :   :                        | 450 |
| ACE2_HUMAN | 401 | HEAVGEIMSLSAATPKHLKSIIGLLSPDFQEDNETEINFLKQALTIVGTL                                                   | 450 |
| ACE2_FELCA | 451 | PFTYMLEKWRWVFKGEIPKEQWMQKWWEMKREIVGVVEPVPHDETYCDP<br>       :    :       :                           | 500 |
| ACE2_HUMAN | 451 | PFTYMLEKWRWVFKGEIPKDQWMKKWWEMKREIVGVVEPVPHDETYCDP                                                    | 500 |
| ACE2_FELCA | 501 | ASLFHVANDYSFIRYYTRTIYQFQFQEALCRIAKHEGPHKCDISNSSEA<br>     :       :       : .        :               | 550 |
| ACE2_HUMAN | 501 | ASLFHVSNDYSFIRYYTRTLYQFQFQEALCQAAKHEGPHKCDISNSTEA                                                    | 550 |
| ACE2_FELCA | 551 | GKKLLQMLTLGKSKPWTLALAHVVGEEKMNVTPLLKYFEPLFTWLKEQNR<br> : . . .    :       :   . .    .    .      : : | 600 |
| ACE2_HUMAN | 551 | GQKLFNMLRLGKSEPWTLALENVVGAKNMNVRPLLNYFEPLFTWLKDQNK                                                   | 600 |
| ACE2_FELCA | 601 | NSFVGWNTDWRPYADQSIKVRISLKSALGDEAYEWNENMYLFRSSVAYA<br>     :   .        :       :                     | 650 |
| ACE2_HUMAN | 601 | NSFVGWSTDWSPYADQSIKVRISLKSALGDKAYEWNENMYLFRSSVAYA                                                    | 650 |
| ACE2_FELCA | 651 | MREYFSKVKVQTIQFVEDNVVSNLKPRIFFVTASKNVSDVIPRSEV<br>  : . .      . . . : . :   :       :    : :        | 700 |
| ACE2_HUMAN | 651 | MRQYFLKVKVQMIQFGEEDVRVANLKPRIFFVTAPKNVSDIIPRTEV                                                      | 700 |
| ACE2_FELCA | 701 | EEAIRMSRSRINDAFRLDDNSLEFLGIQPTLSPPYQPPVTIWLIVFGVVM<br> :       :       : . .    :                    | 750 |
| ACE2_HUMAN | 701 | EKAIRMSRSRINDAFRLDNDNSLEFLGIQPTLGPPNQPPVTIWLIVFGVVM                                                  | 750 |

|            |     |                                                    |     |
|------------|-----|----------------------------------------------------|-----|
| ACE2_FELCA | 751 | GVVVGVLLIVSGIRNRRKNNQARSEENPYASVDLSKGENNPQFHADD    | 800 |
|            |     | :     : .:.:    : .:.:    .     : :       : .      |     |
| ACE2_HUMAN | 751 | GVIVVGIVILIFTGIRDRKKKNKARSGENPYASIDISKGENNPQFQNTDD | 800 |
| ACE2_FELCA | 801 | VQTSF                                              | 805 |
|            |     |                                                    |     |
| ACE2_HUMAN | 801 | VQTSF                                              | 805 |

#-----  
#-----

```
#####
# Program: needle
# Rundate: Sat 23 May 2020 11:28:56
# Commandline: needle
#   -auto
#   -stdout
#   -asequence emboss_needle-I20200523-112955-0071-59784166-
p1m.asequence
#   -bsequence emboss_needle-I20200523-112955-0071-59784166-
p1m.bsequence
#   -datafile EBLOSUM62
#   -gapopen 10.0
#   -gapextend 0.5
#   -endopen 10.0
#   -endextend 0.5
#   -aformat3 pair
#   -sprotein1
#   -sprotein2
# Align_format: pair
# Report_file: stdout
#####
```

```
#=====
#
# Aligned_sequences: 2
# 1: SPIKE_SARS2
# 2: AJO26983.1
# Matrix: EBLOSUM62
# Gap_penalty: 10.0
# Extend_penalty: 0.5
#
# Length: 1618
# Identity:      408/1618 (25.2%)
# Similarity:    648/1618 (40.0%)
# Gaps:          497/1618 (30.7%)
# Score: 1110.5
#
#
#=====
```

```
SPIKE_SARS2      1 MFVFLVLLPLVSS-QCVNLTTRTQLPPAYTNSFTRGVYYPDKVFRSSVLH
49
      |.:.||||.:|.:. . . . . |..|...:|.|      || |.:.:.
AJO26983.1      1 MILLLVLFVSVVGAHDAPHGVTLPQFNTSYNN-----DK-FELNFYN
40

SPIKE_SARS2      50 --STQDL-----FLPFF---SNVTWFHAIHVS--GTNGTKRF---
79
      .|. |:           :||:.   :|..|:..:..   |:||....
AJO26983.1      41 FLQTDWIDIPPNTETILGGYLPYCGTGANCGWYNFVYQQNVGSGNGKYSYINT
90

SPIKE_SARS2      80 DNPVLPFNDGVYFASTEKSN-----IIRGWIFGTTLDSTQ-S
116
      .|.:|.|...|...|...|...|.:.           :|           .:..|:| |
AJO26983.1      91 QNLNIPNVHGVYFDVREHNSDGVWDARDRVGLLI-----AIHGKSQYS
```

133

|             |     |                                                     |
|-------------|-----|-----------------------------------------------------|
| SPIKE_SARS2 | 117 | LLIV-----NNATNVVIKVCEF-----QF-----C-----            |
| 136         |     |                                                     |
|             |     | :  . .:. :. : :.:                                   |
| AJO26983.1  | 134 | LLMVLQDDVEENQPHVAVKICHWKPGNISSIHQFSVNLGDGGQCVFNQRF  |
| 183         |     |                                                     |
| SPIKE_SARS2 | 137 | -----NDPFLGVYHKN-----NKSWMESSEFRVYSSANNCTF          |
| 168         |     |                                                     |
|             |     | . .:.:.  . . .:.:. . . .:.:.:                       |
| AJO26983.1  | 184 | SLDTILTND-FYGFQWTNMYVNIYLGTTITKVWVENDWSVVESSISYHW   |
| 232         |     |                                                     |
| SPIKE_SARS2 | 169 | EYVSQPFLMDLEGKQGNFKNLREFVFKNIDG-----YFKIY           |
| 204         |     |                                                     |
|             |     | :.:.:. . .:.: . .:. . . . . . . . . .:              |
| AJO26983.1  | 233 | SRLNYGYMQFVNR-----TTYVYNNVTGGANYTHLQLEECHSEYCYAGY   |
| 276         |     |                                                     |
| SPIKE_SARS2 | 205 | SKHTPINLVRDLPQGFSAL-----EPLVDLPIGINITRFQT           |
| 240         |     |                                                     |
|             |     | : .:.:.:. . . . . . . . . .:.:. . .:                |
| AJO26983.1  | 277 | AKNVFVPIDGKIPDGFSFSNWFLLSDKSTSVQGRVLSKQPVFVQCLR---  |
| 323         |     |                                                     |
| SPIKE_SARS2 | 241 | LLALHRSYLTTPGDSSSGWTAGAAAYVGYLQPRTF-----LLKYNENG    |
| 283         |     |                                                     |
|             |     | :... :.: . . . . . . . . . . . . . . .:             |
| AJO26983.1  | 324 | -----AVPSWSNNSA---VVHFSNDDFCPNVTAEVLRFNLF           |
| 357         |     |                                                     |
| SPIKE_SARS2 | 284 | TITDAVDCALDPLSETKCTLKSFTVE----KGI--YQTSNFR-VQPTESI  |
| 326         |     |                                                     |
|             |     | :. . . . .:. . . . . . . . . . . . . . .:           |
| AJO26983.1  | 358 | SDTDVY-----VASNSDDRLYFTFEDNTTAGVACYSSANITDYKPN---   |
| 398         |     |                                                     |
| SPIKE_SARS2 | 327 | VRFPNITNLCPFGEVFNA-----TRFASV-----YAWNRKR           |
| 357         |     |                                                     |
|             |     | . .:. . . . . . . . . . . . . . . . . . .:          |
| AJO26983.1  | 399 | ---TNASSQTPFGKTTHSYFCFANFSSSHVTQFLGILPPIVREFAFGK--- |
| 443         |     |                                                     |
| SPIKE_SARS2 | 358 | ISNCVADYSVL---YNSASFSTFKCYGVSPTKLND-----LCFTNVYADS  |
| 399         |     |                                                     |
|             |     | . .:. . . . . . . . . . . . . . . . . . .:          |
| AJO26983.1  | 444 | -----DGSIFVNGYKYFSFPPIKSVNFSISSVENFGFWTIAYTN-YTDV   |
| 486         |     |                                                     |
| SPIKE_SARS2 | 400 | FV-IRGDEVRQI----APGQTGKIADYNYKLPDFTGCVIAWNSNLDISK   |
| 444         |     |                                                     |
|             |     | .  . . . . . . . . . . . . . . . . . . . .:         |
| AJO26983.1  | 487 | MVDVNGTGITRLFYCDSPINRIKQQLKYELPDGF-----YSASMLVKK    |
| 530         |     |                                                     |
| SPIKE_SARS2 | 445 | -----VGGNYNYL-----YRFRKSNLKPFERDIST                 |



470  
AJ026983.1 531 DLPKTFVVTMPQFYNNWNVTLHVVLNDTEKKADIILAKASELASL-ADVHF  
579  
SPIKE\_SARS2 471 EIYQAGSTPCN-----GVEGFNCY---FPLQSYG--F  
497  
AJ026983.1 580 EIAQANGSVVNATSLCVQTRQLALFYKYTSLQGLYTYSNLVELQNYDCPF  
629  
SPIKE\_SARS2 498 QPTNGVGYQPYP-----VVVLSFELLH-----  
519  
AJ026983.1 630 SPHQFNYYLQFETLCFDTSPAVAGCKWSLVHDVWRWRTQFATITISYKDGA  
679  
SPIKE\_SARS2 520 ---APATVCGPKKSTNLVKNKCVNFNFNGLTGTGVLTESNKKF---LPF  
562  
AJ026983.1 680 KITTMPKAKLGFQDISNIVKDECTDYNIYGLQGTGIIRNTTTRIVAGLYY  
729  
SPIKE\_SARS2 563 QQFGRDIADTTDAVRDPQTLLEILDITPCSFSGG-----VSVITPGTN  
603  
AJ026983.1 730 TSISGDLL---AFKNSTTGEIFTVVPCGLTAQAAVINDEIVGVITAVNQ  
775  
SPIKE\_SARS2 604 TSNQVAVLYQDVNCTEVPVAIHADQLTPTWRVYSTGSNVFQTRAGCLIGA  
653  
AJ026983.1 776 TD-----LFEFVNHTQARRARS-----STGSQTVQTYT-----  
803  
SPIKE\_SARS2 654 EHVNSYECDIPIGAGICASYQTQTNPPRRARSVASQSI IAYTM-----  
697  
AJ026983.1 804 --MPQFY-----YITKWNNND---SSTNCTSVITYSSFAICNT  
835  
SPIKE\_SARS2 698 -----SLGAENSVAYSNNNSIAIPTNFTISVTTEILPVSM  
731  
AJ026983.1 836 GEIKYVNVTHVEIVDDSIGVIKPI--STGNISIPKNFTVAVQAEYIQIQV  
883  
SPIKE\_SARS2 732 TKTSVDCTMYICGDSSTECNLLLQYGSFCTQLNRALT-GIAVE-----  
773  
AJ026983.1 884 KPVVVDCAKYVCNGNSHCLTLLAQYTSACQTIENALNFGARLESMLNDM  
933  
SPIKE\_SARS2 774 ---QDKNTQEVFAQVKQIYKTP-PIKDFGGFNFS---QILPDPSKPS--K  
814  
AJ026983.1 934 ITVSDRSLE--LATVEKFNTTVLGAEKLGGFYFDGLRELLP----PTIGK

SPIKE\_SARS2 815 RSFIEDLLFNKVTLADAGFI-KQYGDCLGDIAARDLICAQKFNGLTVLPP  
863

||.|||||...:.: ..|......|:||||.::|.|||.

AJO26983.1 978 RSAIEDLLFNKVVT SGLGTVDDDYKKCSAGTDVADLVCAQYYNGIMVLP  
1027

SPIKE\_SARS2 864 LLTDEMIAQYTSALLA----GTITSGWTFGAGAALQIPFAMQMAYRFNGI  
909

:.....:|::|: . |:| | | :::| | | | :...|.: :

AJO26983.1 1028 VVDQNKMSMYTASLIGGMALGSITS-----AVAVPFAMQVQARLNYV  
1069

SPIKE\_SARS2 910 GVTQNVLYENQKLIANQFNSAIGKI-----QDSLSTASAL  
945

.....:|.|.||||:|.|.||||:|.| | | | . |. . . . . ||| |

AJO26983.1 1070 ALQTDVLQENQKILANAFNNAIGNITLALGKVSNAITTTSDGFNTMASAL  
1119

SPIKE\_SARS2 946 GKLQDVVNQNAQALNTLVKQLSSNFGAISSVLDILSRLDKVEAEVQIDR  
995

. |:|.||||.....|:|. . .|. .|. .|. .|. .|. .:|. :||:| | | :. |:| |

AJO26983.1 1120 TKIQSVVNHQGDALSQLTSQLQKNFQAISSSIAEIYNRLEKVEADAQVDR  
1169

SPIKE\_SARS2 996 LITGRLQSLQTYVTQQLIRAAEIRASANLAATKMSECVLGQSKRVDFCGK  
1045

||| | | |. :|. .|. | :|. .|. . .:|:| | | |. . :| | | |. |. .| | |.

AJO26983.1 1170 LITGRLAALNAYVSQTLTQYSEVKASRQLAMEKVNCECVKSQSNRYGF  
1219

SPIKE\_SARS2 1046 GYHLMSFPQSAPHGVVFLHVTVPAQEKNFTTAPAIC-HDGKAHFPRE--  
1092

|. | | |. |. .| | |. |:|. .|. . .:|. . . . .| . . . .| | :|. .| :. . . .

AJO26983.1 1220 GTHLFSLVNSAPDGLLFFHTVLLPTEWEVVTAWSGICVNDTYAYVLKDFE  
1269

SPIKE\_SARS2 1093 -GVFVSNGTHWVFVTQRNFYEP-----QIIITDNTFVSGNC----DV  
1128

.:|. .| | | | :|. | | | |. :| | | |. :| | | | |. :. . . . . :. : :

AJO26983.1 1270 YSIFSYNGT-YMVT PRNMFPQRK PQMSDFVQITSCEVTFLNTTYTTFQEI  
1318

SPIKE\_SARS2 1129 VIGI--VNNTVYDPLQPELDSFKEELDKYFKNHSTPDVDLGDISGINASV  
1176

| | | . :|. | :. | | | | | :|:| | | | :|:|:|:| | :. . . |. . . :

AJO26983.1 1319 VIDYIDINKTIAD-----MLEQYNLNYYTSELNL-QLEIFNQTK  
1356

SPIKE\_SARS2 1177 VNIQKEIDRLNEVA-----KNL NESLIDLQELGKYEQYIKW  
1212

:|:|. .| | | | :|. . . | | | | :|:|:|:| | :. |. . . |. | :| |

AJO26983.1 1357 LNLTAEIDQLEQRADNLTNIAHELQQYIDNLNKTLVDLEWLN RVET YVKW  
1406

SPIKE\_SARS2 1213 PWYIWLGFIAGLIAIVMVTIML-CCM-TSCC SCLKGCCSCGSCC-----K

1255

||||:| | :.|:|.:.:.:.:| ||:|.|.|.|. || .| || | :  
AJO26983.1 1407 PWYVWL--LIGLVVVFICIPLLLFCCLSTGCCGCF-GC--LGSCCHSLCSR  
1451

SPIKE\_SARS2 1256 FDEDDSEPVLKGVKLHYT 1273

.:.:.|. |:|. |.:|  
AJO26983.1 1452 RQFESYEPIEK-VHIH-- 1466

#-----  
#-----
