# Supplementary material
Source: PubMed Central journal article supplement (PMC7846899)
Supplement: mmc4.pdf [file mmc4.pdf]

|                     |                                                              |        |
|---------------------|--------------------------------------------------------------|--------|
| P10033 UniProt      | IYSVTPCDVSAQAAVIDGAIVGAMTSINSELL-GLT-----HWTTPN              | 775    |
| AJO27023.1 KP143512 | IFTVVPCGLTAQAAVINDEIVGVITAVNQTDLFEFVNHTQARGARRSTGSQTVQTYTMPQ | 806    |
| AJO26973.1 KP143507 | IFTVVPCGLTAQAAVINDEIVGVITAVNQTDLFEFVNHTQARGARRSTGSQTVQTYTMPQ | 806    |
| AJO26983.1 KP143508 | IFTVVPCGLTAQAAVINDEIVGVITAVNQTDLFEFVNHTQARRARRSTGSQTVQTYTMPQ | 806    |
| AJO27013.1 KP143511 | IFTVVPCGLTAQAAVINDEIVGVITAVNQTDLFEFVNHTQARRARRSTGSQTVQTYTMPQ | 806    |
| AJO26993.1 KP143509 | IFTVVPCGLTAQAAVINDEIVGVITAVNQTDLFEFVNHTQARRARRSTGSQTVQTYTMPQ | 806    |
| AJO27003.1 KP143510 | IFTVVPCGLTAQAAVINDEIVGVITAVNQTDLFEFVNHTQARRARRSTGSQTVQTYTMPQ | 806    |
|                     | *::*.**.:*****:. ***.:*. * :.                                | : * *: |

**Supplementary Figure 1 The Multiple Sequence Alignment of FCoV serotype 1 Spike protein isolates with FIPV serotype (from UniProt P10033). Only the region corresponding to polybasic insert is shown.**
